# Supplementary material for: Characterization of an Escherichia coli-derived triple-type chimeric vaccine against human papillomavirus types 39, 68 and 70
Source: PubMed Central journal article supplement (PMC9622684; doi:10.1038/s41541-022-00557-y), 2022-10-31
Supplement: 41541_2022_557_MOESM1_ESM.pdf [file 41541_2022_557_MOESM1_ESM.pdf]

## Supplementary information

### Characterization of an *Escherichia coli*-derived triple-type chimeric vaccine against human papillomavirus types 39, 68 and 70

Ciyang Qian<sup>1,2,#</sup>, Yurou Yang<sup>1,2,#</sup>, Qin Xu<sup>1,2,#</sup>, Zhiping Wang<sup>1,2</sup>, Jie Chen<sup>1,2</sup>, Xin Chi<sup>1,2</sup>, Miao Yu<sup>1,2</sup>, Fei Gao<sup>1,2</sup>, Yujie Xu<sup>1,2</sup>, Yihan Lu<sup>1,2</sup>, Hui Sun<sup>1,2</sup>, Jingjia Shen<sup>1,2</sup>, Daning Wang<sup>1,2</sup>, Lizhi Zhou<sup>1,2</sup>, Tingting Li<sup>1,2</sup>, Yingbin Wang<sup>1,2</sup>, Qingbing Zheng<sup>1,2</sup>, Hai Yu<sup>1,2</sup>, Jun Zhang<sup>1,2</sup>, Ying Gu<sup>1,2,\*</sup>, Ningshao Xia<sup>1,2,\*</sup>, Shaowei Li<sup>1,2,\*</sup>

\* To whom correspondence should be addressed. Email: [shaowei@xmu.edu.cn](mailto:shaowei@xmu.edu.cn)

(S.L.) or [nsxia@xmu.edu.cn](mailto:nsxia@xmu.edu.cn) (N.X.) or [guying@xmu.edu.cn](mailto:guying@xmu.edu.cn) (Y.G.)

This PDF file includes:

Supplementary Figures 1 to 4

Supplementary Tables 1 to 4

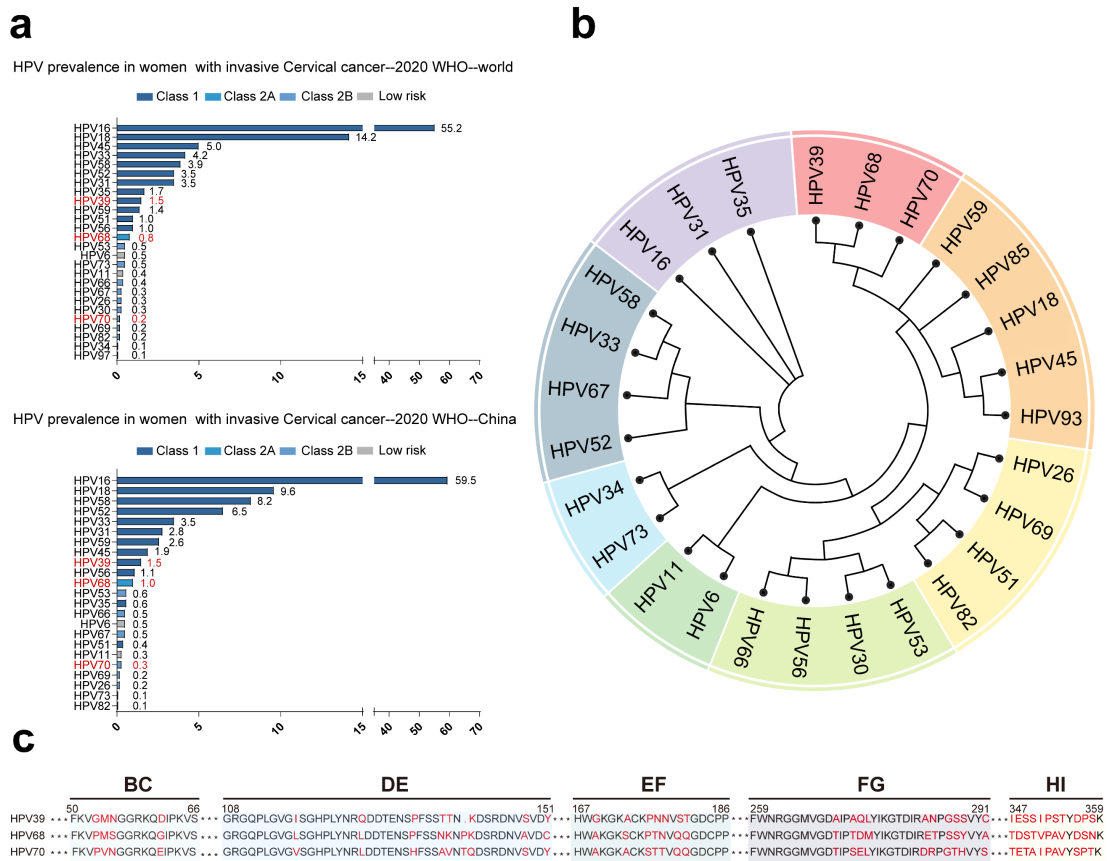

**Supplementary Figure 1.** Evolution analysis of 27 HPV L1 proteins and the prevalence of these types among women with invasive cervical cancer. **a** The proportion of various HPV types in women with invasive cervical cancer in China and the world according to the 2021 WHO report (URL: <https://hpvcentre.net/statistics/reports/XWX.pdf?t=1646934138325>). HPV types are divided into classes according to carcinogenicity: class 1 (carcinogenic), class 2A (probably carcinogenic), class 2B (possibly carcinogenic) and class 3 (low-risk). **b** Phylogenetic tree of 27 HPV types based on the HPV L1 amino acid sequence. According to the closeness of the relationship, 25 types of high-risk HPV and 2 types of low-risk HPV can be divided into 8 evolutionary clusters. **c** Comparison of the amino acid sequences of the surface loops (BC, DE, EF, FG and HI-loop) of HPV39, -68 and -70. A red font is used to indicate that the three amino acids are different, whereas a black font indicates that they are the same.

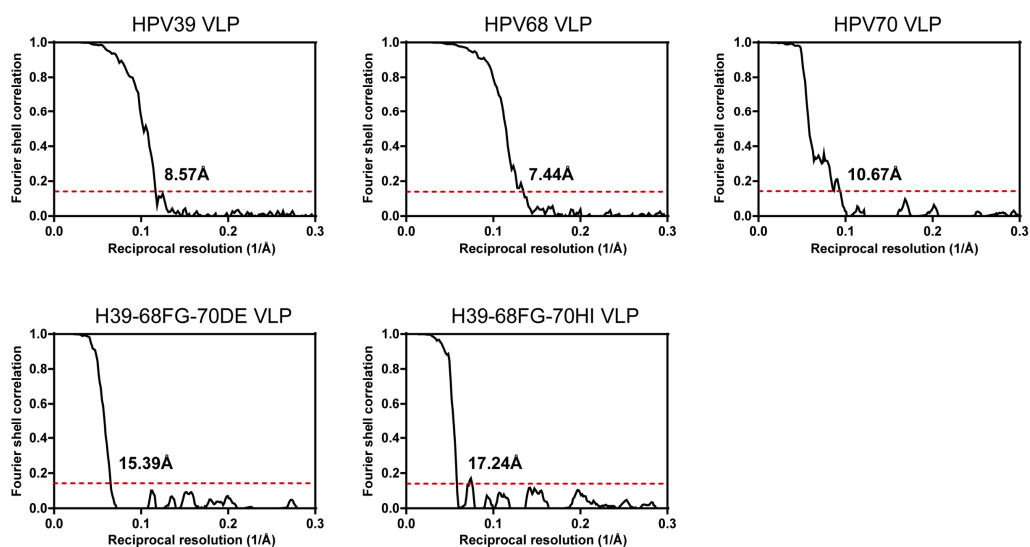

**Supplementary Figure 2.** Gold standard FSC curves of the icosahedral reconstructions of HPV39, HPV68, HPV70, H39-68FG-70DE and H39-68FG-70HI at resolutions of 8.57 Å, 7.44 Å, 10.67 Å, 15.39 Å, and 17.24 Å, respectively, with a cut-off threshold of 0.143.

**a**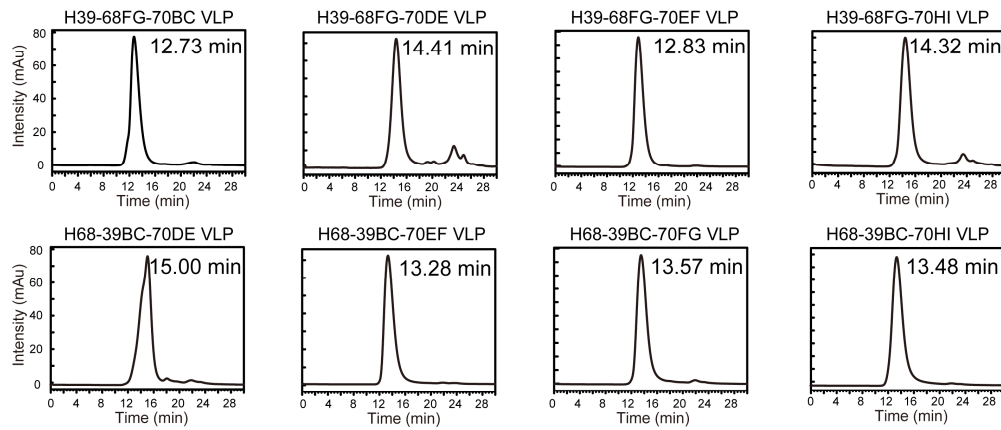**b**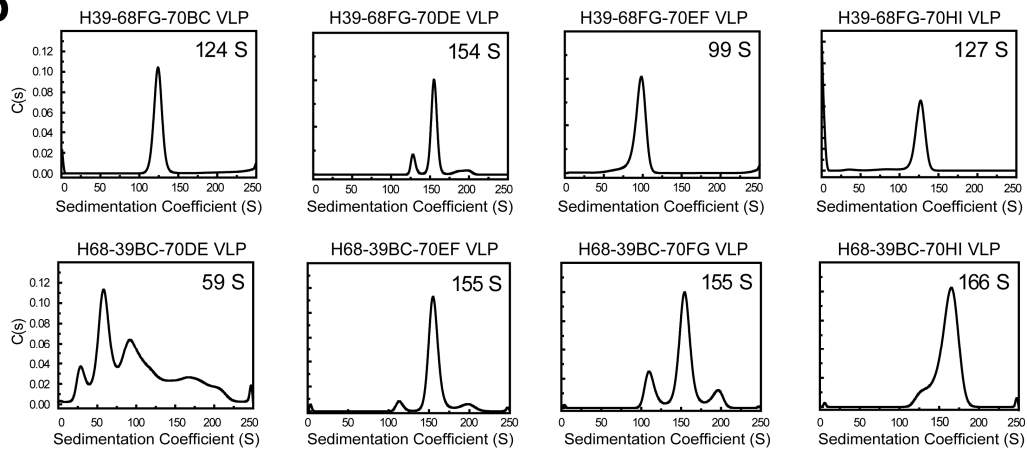

**Supplementary Figure 3.** Characterization of HPV39/68/70 chimeric VLPs. **a-** High-performance size-exclusion chromatography (HPSEC) profiles (**a**) and analytical ultracentrifugation sedimentation (AUC) profiles (**b**) of the chimeric VLPs.

**Fig.1a**

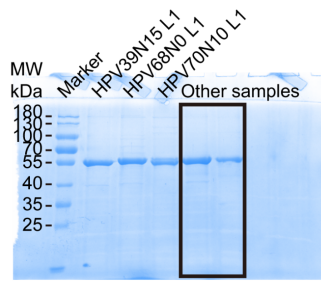

**Fig.1b**

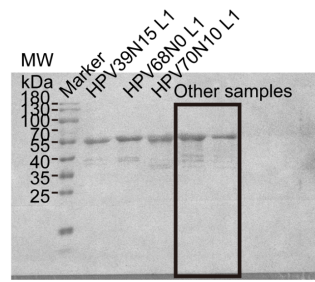

**Fig.2a**

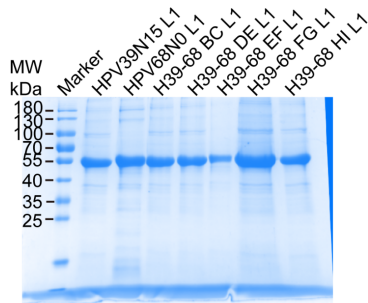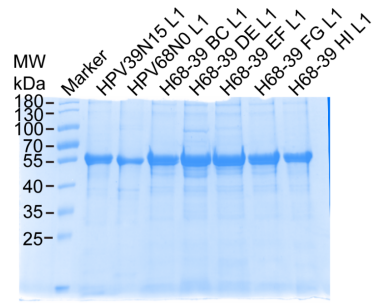

**Fig.2b**

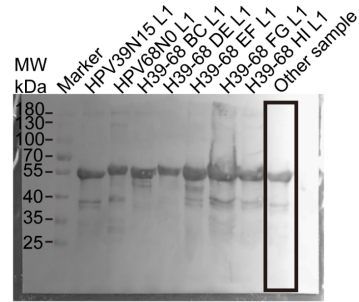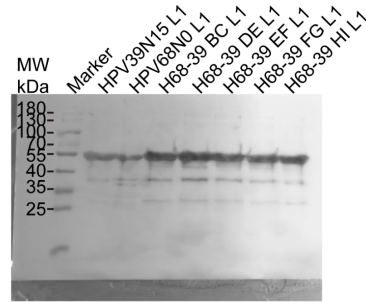

**Fig.4b**

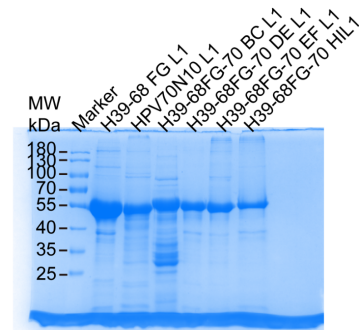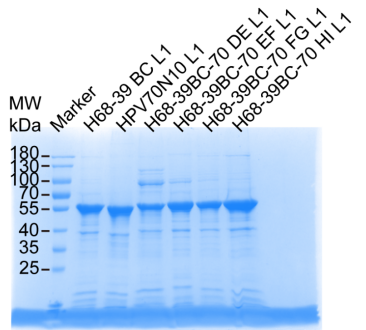

**Fig.4c**

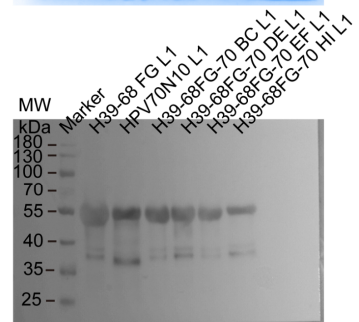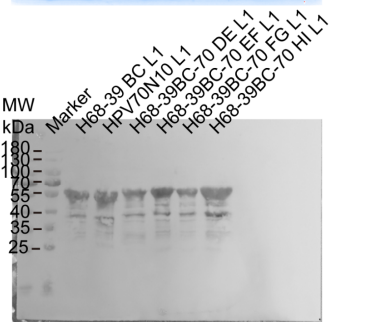

**Supplementary Figure 4.** Uncropped original scans of blots and gels from Figure 1a, 1b, 2a, 2b, 4b and 4c.

**Supplementary Table 1. Statistics of cryo-EM data collection and refinement.**

|                                           | HPV39      | HPV68      | HPV70      | H39-68FG-70DE | H39-68FG-70HI |
|-------------------------------------------|------------|------------|------------|---------------|---------------|
| Microscope                                | TF30       | TF30       | TF30       | TF30          | TF30          |
| Camera                                    | Falcon III | Falcon III | Falcon III | Falcon III    | Falcon III    |
| Magnification                             | 93,000     | 93,000     | 93,000     | 93,000        | 93,000        |
| Voltage (kV)                              | 300        | 300        | 300        | 300           | 300           |
| Electron exposure (e/Å <sup>2</sup> )     | 30         | 30         | 30         | 30            | 30            |
| Defocus range (μm)                        | -1.1~-4.1  | -0.9~-4.4  | -0.5~-2.7  | -0.5~-4.7     | -1.6~-5.2     |
| Pixel size (Å)                            | 1.120 Å    | 1.120 Å    | 1.120 Å    | 1.120 Å       | 1.120 Å       |
| Micrographs                               | 272        | 512        | 577        | 672           | 303           |
| Final particle (no.)                      | 7,651      | 7,456      | 2,051      | 6,410         | 1,933         |
| Symmetry imposed                          | I2         | I2         | I2         | I2            | I2            |
| Map resolution (Å)                        | 8.57       | 7.44       | 10.67      | 15.39         | 17.24         |
| FSC threshold                             | 0.143      | 0.143      | 0.143      | 0.143         | 0.143         |
| Map sharpening B factor (Å <sup>2</sup> ) | -200       | -250       | 0          | 0             | 0             |

**Supplementary Table 2. Half-Effective Dose (ED<sub>50</sub>) in Mice for Aluminum Adjuvant Containing Chimeric or WT VLPs of HPV39 and HPV68**

| Antigen<br>(VLP) | Dose<br>( $\mu$ g) | PsV39               |                  | PsV68               |                  |
|------------------|--------------------|---------------------|------------------|---------------------|------------------|
|                  |                    | Seroconversion no./ | ED <sub>50</sub> | Seroconversion no./ | ED <sub>50</sub> |
|                  |                    | inoculated no.      | ( $\mu$ g)       | inoculated no.      | ( $\mu$ g)       |
| H39-68FG         | 0.900              | 6/8                 | 0.091            | 3/8                 | 0.405            |
|                  | 0.300              | 6/8                 |                  | 4/8                 |                  |
|                  | 0.100              | 6/8                 |                  | 2/8                 |                  |
|                  | 0.033              | 1/8                 |                  | 1/8                 |                  |
| H68-39BC         | 0.900              | 4/8                 | 0.395            | 8/8                 | 0.021            |
|                  | 0.300              | 4/8                 |                  | 8/8                 |                  |
|                  | 0.100              | 1/8                 |                  | 8/8                 |                  |
|                  | 0.033              | 1/8                 |                  | 7/8                 |                  |
| H68-39HI         | 0.900              | 0/8                 | > 0.900          | 7/8                 | 0.028            |
|                  | 0.300              | 0/8                 |                  | 8/8                 |                  |
|                  | 0.100              | 0/8                 |                  | 7/8                 |                  |
|                  | 0.033              | 0/8                 |                  | 6/8                 |                  |
| HPV39            | 0.900              | 8/8                 | 0.022            | 0/0                 | > 0.900          |
|                  | 0.300              | 8/8                 |                  | 0/0                 |                  |
|                  | 0.100              | 6/8                 |                  | 0/0                 |                  |
|                  | 0.033              | 8/8                 |                  | 0/0                 |                  |
| HPV68            | 0.900              | 0/0                 | > 0.900          | 8/8                 | 0.023            |
|                  | 0.300              | 0/0                 |                  | 8/8                 |                  |
|                  | 0.100              | 0/0                 |                  | 7/8                 |                  |
|                  | 0.033              | 0/0                 |                  | 7/8                 |                  |
| HPV39&68         | 0.900              | 7/8                 | 0.021            | 7/8                 | 0.023            |
|                  | 0.300              | 8/8                 |                  | 8/8                 |                  |
|                  | 0.100              | 8/8                 |                  | 8/8                 |                  |
|                  | 0.033              | 8/8                 |                  | 7/8                 |                  |

**Supplementary Table 3. Half-Effective Dose (ED<sub>50</sub>) in Mice for Aluminum Adjuvant Containing Chimeric or WT VLPs of HPV39, HPV68 and HPV70**

| Antigen<br>(VLP) | Dose<br>( $\mu$ g) | PsV39                                     | PsV68                          | PsV70                                     |                                |                                           |                                |
|------------------|--------------------|-------------------------------------------|--------------------------------|-------------------------------------------|--------------------------------|-------------------------------------------|--------------------------------|
|                  |                    | Seroconversio<br>n no./<br>inoculated no. | ED <sub>50</sub><br>( $\mu$ g) | Seroconversio<br>n no./<br>inoculated no. | ED <sub>50</sub><br>( $\mu$ g) | Seroconversio<br>n no./<br>inoculated no. | ED <sub>50</sub><br>( $\mu$ g) |
| H39-68FG-70DE    | 0.900              | 8/8                                       | 0.021                          | 6/8                                       | 0.030                          | 7/8                                       | 0.040                          |
|                  | 0.300              | 7/8                                       |                                | 8/8                                       |                                | 7/8                                       |                                |
|                  | 0.100              | 8/8                                       |                                | 7/8                                       |                                | 5/8                                       |                                |
|                  | 0.033              | 8/8                                       |                                | 6/8                                       |                                | 6/8                                       |                                |
| H39-68FG-70EF    | 0.900              | 3/8                                       | 0.900                          | 7/8                                       | 0.024                          | 4/8                                       | 0.611                          |
|                  | 0.300              | 1/8                                       |                                | 7/8                                       |                                | 3/8                                       |                                |
|                  | 0.100              | 0/8                                       |                                | 7/8                                       |                                | 0/8                                       |                                |
|                  | 0.033              | 1/8                                       |                                | 8/8                                       |                                | 0/8                                       |                                |
| H39-68FG-70HI    | 0.900              | 7/8                                       | 0.022                          | 8/8                                       | 0.148                          | 7/8                                       | 0.047                          |
|                  | 0.300              | 7/8                                       |                                | 8/8                                       |                                | 6/8                                       |                                |
|                  | 0.100              | 8/8                                       |                                | 1/8                                       |                                | 8/8                                       |                                |
|                  | 0.033              | 8/8                                       |                                | 1/8                                       |                                | 4/8                                       |                                |
| HPV39            | 0.900              | 8/8                                       | 0.019                          | 0/8                                       | > 0.900                        | 0/8                                       | > 0.900                        |
|                  | 0.300              | 8/8                                       |                                | 0/8                                       |                                | 1/8                                       |                                |
|                  | 0.100              | 8/8                                       |                                | 0/8                                       |                                | 0/8                                       |                                |
|                  | 0.033              | 8/8                                       |                                | 1/8                                       |                                | 0/8                                       |                                |
| HPV68            | 0.900              | 0/8                                       | > 0.900                        | 8/8                                       | 0.021                          | 2/8                                       | 0.900                          |
|                  | 0.300              | 0/8                                       |                                | 8/8                                       |                                | 2/8                                       |                                |
|                  | 0.100              | 1/8                                       |                                | 8/8                                       |                                | 0/8                                       |                                |
|                  | 0.033              | 1/8                                       |                                | 7/8                                       |                                | 2/8                                       |                                |
| HPV70            | 0.900              | 2/8                                       | > 0.900                        | 0/8                                       | > 0.900                        | 8/8                                       | 0.019                          |
|                  | 0.300              | 0/8                                       |                                | 0/8                                       |                                | 8/8                                       |                                |
|                  | 0.100              | 1/8                                       |                                | 0/8                                       |                                | 8/8                                       |                                |



|             |       |     |       |     |       |     |       |
|-------------|-------|-----|-------|-----|-------|-----|-------|
|             | 0.033 | 1/8 |       | 0/8 |       | 8/8 |       |
| HPV39&68&70 | 0.900 | 8/8 | 0.021 | 8/8 | 0.021 | 8/8 | 0.021 |
|             | 0.300 | 8/8 |       | 8/8 |       | 8/8 |       |
|             | 0.100 | 7/8 |       | 7/8 |       | 7/8 |       |
|             | 0.033 | 8/8 |       | 8/8 |       | 8/8 |       |

---

**Supplementary Table 4. Characterization of HPV39, HPV68 and HPV70 mAb panel and antigenicity assay of HPV39/68/70 chimeras.**

| Immunogen<br>for antibody<br>generation<br>(VLP) | mAbs  | Isotype | mAb reactivity of WT HPV39, HPV68, HPV70 and HPV39/68/70<br>chimeras (EC <sub>50</sub> , ng) |        |        |                     |                     |
|--------------------------------------------------|-------|---------|----------------------------------------------------------------------------------------------|--------|--------|---------------------|---------------------|
|                                                  |       |         | HPV39                                                                                        | HPV68  | HPV70  | HPV39-<br>68FG-70DE | HPV39-<br>68FG-70HI |
|                                                  |       |         | HPV39                                                                                        | 2D11   | IgG1   | 30.1                | >10000              |
|                                                  | 3A2   | IgG2b   | 2109.0                                                                                       | >10000 | >10000 | >10000              | >10000              |
|                                                  | 3C12  | IgG1    | 51.4                                                                                         | >10000 | >10000 | >10000              | >10000              |
|                                                  | 5F10  | IgG1    | 20.4                                                                                         | >10000 | >10000 | >10000              | >10000              |
|                                                  | 19B8  | IgG2b   | 6.3                                                                                          | >10000 | >10000 | 4.3                 | 6.4                 |
|                                                  | 20F8  | IgG2a   | 490.1                                                                                        | 1026.0 | >10000 | 1005.0              | 690.5               |
| HPV68                                            | 5E10  | IgG1    | >10000                                                                                       | 4.4    | >10000 | >10000              | 192.2               |
|                                                  | 3B9   | IgG1    | >10000                                                                                       | 1.6    | >10000 | >10000              | 289.6               |
|                                                  | 9F4   | IgG2a   | >10000                                                                                       | 20.2   | >10000 | >10000              | 63.0                |
|                                                  | 15E2  | IgG1    | >10000                                                                                       | 2.4    | >10000 | 8915.0              | 6877.0              |
|                                                  | 1C1   | IgG1    | >10000                                                                                       | 6.5    | >10000 | 434.0               | >10000              |
|                                                  | 13F9  | IgG1    | >10000                                                                                       | 12.5   | >10000 | 331.6               | 1782.0              |
|                                                  | 15E9  | IgG1    | >10000                                                                                       | 18.6   | >10000 | 4216.0              | >10000              |
| HPV70                                            | 2A9   | IgG1    | >10000                                                                                       | >10000 | 5.0    | 20.4                | 2597.00             |
|                                                  | 16A3  | IgG1    | >10000                                                                                       | >10000 | 7.8    | 38.9                | 3443.00             |
|                                                  | 16D11 | IgG1    | >10000                                                                                       | >10000 | 6.8    | 38.3                | 3722.00             |
|                                                  | 12B11 | IgG1    | >10000                                                                                       | >10000 | 2.0    | >10000              | 1.3                 |
|                                                  | 16C4  | IgG1    | >10000                                                                                       | >10000 | 4.0    | 18.7                | >10000              |
|                                                  | 10B1  | IgG2b   | >10000                                                                                       | >10000 | 2.6    | 12.6                | 2362.0              |
|                                                  | 10C3  | IgG2b   | >10000                                                                                       | >10000 | 17.2   | 3722.0              | 576.1               |
|                                                  | 10C10 | IgG1    | >10000                                                                                       | >10000 | 65.2   | 3553.0              | 2833.0              |
|                                                  | 7B7   | IgG2b   | >10000                                                                                       | >10000 | 1.6    | 9292.0              | 3053.0              |
|                                                  | 8C10  | IgG1    | >10000                                                                                       | >10000 | 2.0    | 4152.0              | 2761.0              |
